# Supplementary material for: Formation of a discrete helical assembly and packing pattern through charged hydrogen bonds and van der Waals interactions
Source: Royal Society of Chemistry journal article supplement (doi:10.1039/b610512b), 2006-11-06
Supplement: b610512b.pdf [file b610512b.pdf]

## Formation of a discrete helical assembly and packing pattern through charged hydrogen bonds and van der Waals interactions

Ho-Yong Lee, Hae-Jo Kim, Kyoung Jae Lee, Myoung Soo Lah, and Jong-In Hong\*

### Supplementary Information

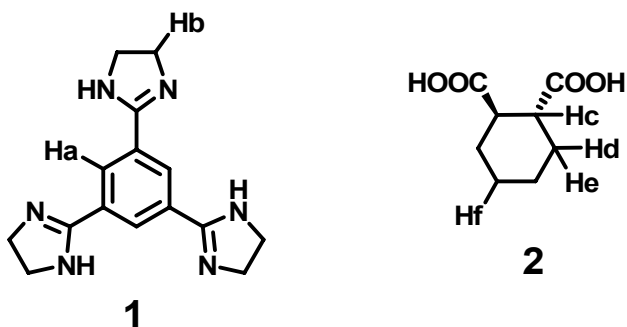

$^1\text{H}$  NMR and  $^{13}\text{C}$  NMR of  $\mathbf{1}_2\cdot\mathbf{2}_3$

$^1\text{H}$  NMR (300 MHz in  $\text{D}_2\text{O}$ ): 8.60 (s, 6H,  $H_a$  of  $\mathbf{1}$ ), 4.23 (s, 24H,  $H_b$  of  $\mathbf{1}$ ), 2.37 (broad m, 6H,  $H_c$  of  $\mathbf{2}$ ), 1.99 (broad m, 6H,  $H_d$  of  $\mathbf{2}$ ), 1.97 (broad m, 6H,  $H_e$  of  $\mathbf{2}$ ), 1.34 (broad m, 12H,  $H_f$  of  $\mathbf{2}$ ).

$^{13}\text{C}$  NMR (60 MHz in  $\text{D}_2\text{O}$ ): 185.6 (carbonyl), 164.6 ( $(\text{NH})_2\text{C-Ar}$  of  $\mathbf{1}$ ), 132.2 (aromatic), 126.3 (aromatic), 104.9 (aliphatic), 49.8 (aliphatic), 45.9 (aliphatic), 30.0 (aliphatic), 25.8 (aliphatic).

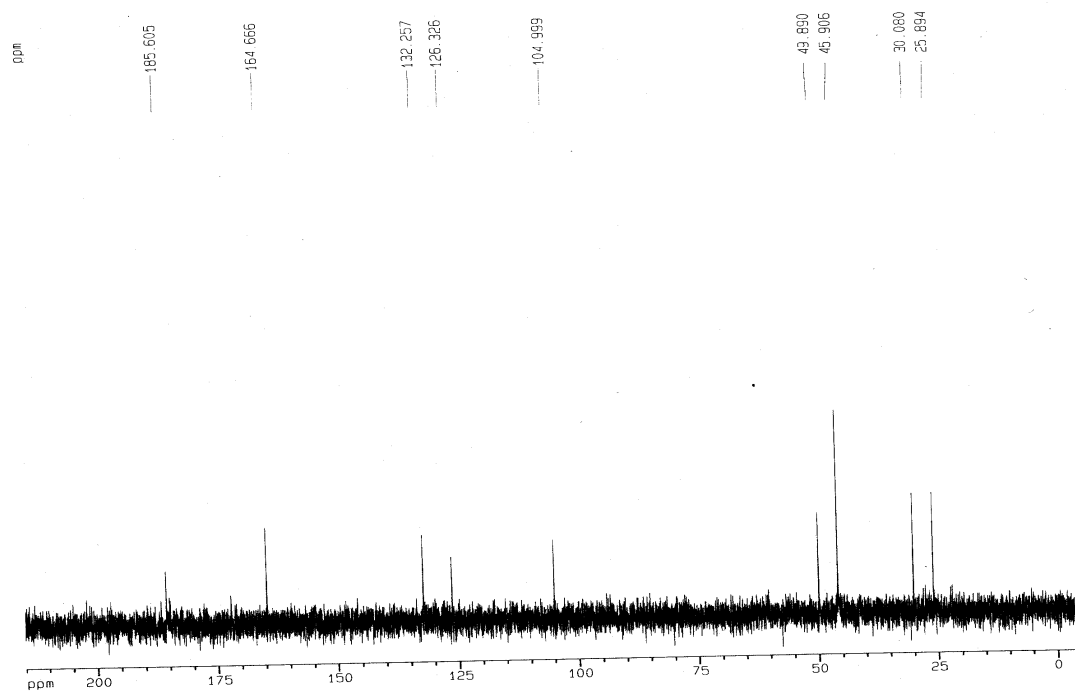

**Figure S1.**  $^{13}\text{C}$  NMR of  $1_2 \cdot 2_3$  in  $\text{D}_2\text{O}$  at 298 K.

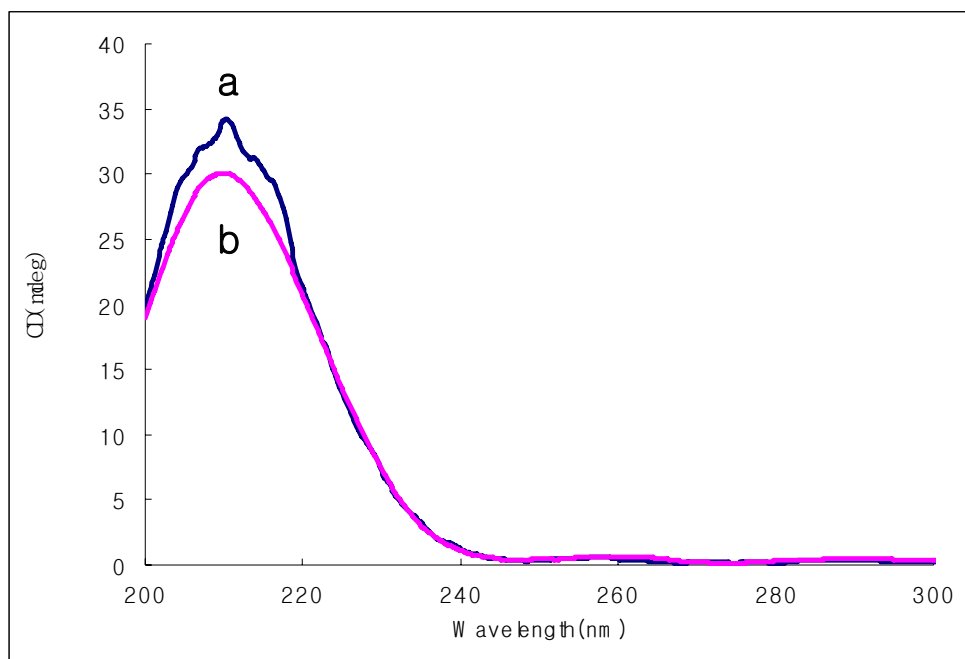

**Figure S2.** CD spectra in H<sub>2</sub>O at 298 K (1mm cell): (a) **1** [0.5 mM] + **2<sup>RR</sup>** [4 mM], (b)

**2<sup>RR</sup>** [4 mM] + **KOH** [1.5 mM].

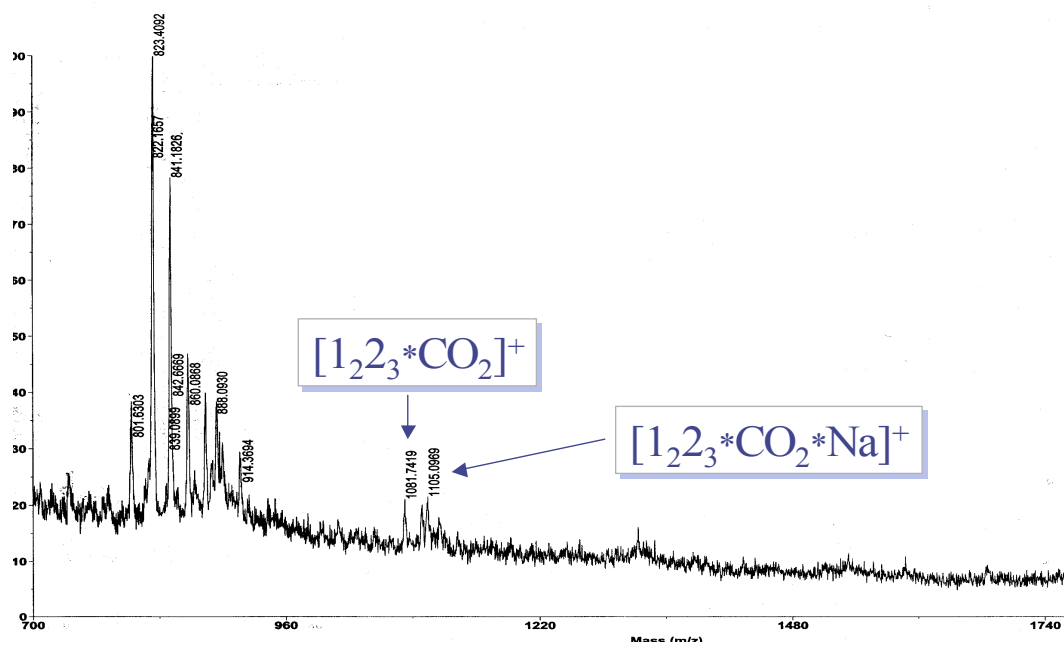

Figure S3. MALDI-TOF mass spectra of  $1_2 \cdot 2_3$ .

### Crystal data

Structure solution and refinement of the structure were carried out using the SHELXTL-PLUS (5.03) software package (Sheldrick, G. M., Brukers Analytical X-Ray Division, Madison, WI, 1997). The structure was solved by direct method and refined successfully in the space group R-3c. Full matrix least-squares refinement was carried out by minimizing  $(F_o^2 - F_c^2)^2$ . All non-hydrogen atoms were refined anisotropically. The two hydrogen atoms of the imidazolinium group involved in hydrogen bonding were located and refined isotropically, and the remaining hydrogen atoms were also located but assigned with isotropic displacement coefficients  $U(H) = 1.2U(C)$  or  $1.5U(C_{methyl})$ . A disordered solvent methanol site was treated with statistical disorder model and the hydrogen atoms were treated using appropriate riding model. The final refinement converged with  $R1 = 0.0729$ ,  $wR2 = 0.2045$  ( $I > 2s(I)$ );  $R1 = 0.1472$ ,  $wR2 = 0.2573$  (all data).

Table S1. Crystal data and structure refinement for **1<sub>2</sub>·2<sub>3</sub>**.

|                                 |                                                                    |                        |
|---------------------------------|--------------------------------------------------------------------|------------------------|
| Identification code             | o3_128tg                                                           |                        |
| Empirical formula               | C60 H96 N12 O18                                                    |                        |
| Formula weight                  | 1273.49                                                            |                        |
| Temperature                     | 173(2) K                                                           |                        |
| Wavelength                      | 0.71073 Å                                                          |                        |
| Crystal system                  | Trigonal                                                           |                        |
| Space group                     | R-3c                                                               |                        |
| Unit cell dimensions            | $a = 27.5164(19)$ Å                                                | $\alpha = 90^\circ$ .  |
|                                 | $b = 27.5164(19)$ Å                                                | $\beta = 90^\circ$ .   |
|                                 | $c = 14.685(2)$ Å                                                  | $\gamma = 120^\circ$ . |
| Volume                          | $9629.2(17)$ Å <sup>3</sup>                                        |                        |
| Z                               | 6                                                                  |                        |
| Density (calculated)            | 1.318 Mg/m <sup>3</sup>                                            |                        |
| Absorption coefficient          | 0.098 mm <sup>-1</sup>                                             |                        |
| F(000)                          | 4104                                                               |                        |
| Crystal size                    | 0.40 x 0.25 x 0.20 mm <sup>3</sup>                                 |                        |
| Theta range for data collection | 1.48 to 28.30°.                                                    |                        |
| Index ranges                    | $-35 \leq h \leq 28$ , $-36 \leq k \leq 36$ , $-19 \leq l \leq 19$ |                        |
| Reflections collected           | 18655                                                              |                        |
| Independent reflections         | 2641 [R(int) = 0.0546]                                             |                        |
| Completeness to theta = 28.30°  | 98.8 %                                                             |                        |

|                                   |                                             |
|-----------------------------------|---------------------------------------------|
| Absorption correction             | Semi-empirical from equivalents             |
| Max. and min. transmission        | 0.9807 and 0.9619                           |
| Refinement method                 | Full-matrix least-squares on F <sup>2</sup> |
| Data / restraints / parameters    | 2641 / 2 / 188                              |
| Goodness-of-fit on F <sup>2</sup> | 1.016                                       |
| Final R indices [I > 2σ(I)]       | R1 = 0.0729, wR2 = 0.2045                   |
| R indices (all data)              | R1 = 0.1472, wR2 = 0.2573                   |
| Largest diff. peak and hole       | 0.347 and -0.297 e.Å <sup>-3</sup>          |

Table S2. Atomic coordinates ( $\times 10^4$ ) and equivalent isotropic displacement parameters ( $\text{\AA}^2 \times 10^3$ ) for **1<sub>2</sub>·2<sub>3</sub>**. U(eq) is defined as one third of the trace of the orthogonalized  $U^{ij}$  tensor.

|       | x       | y       | z        | U(eq)  |
|-------|---------|---------|----------|--------|
| O(1)  | 3181(1) | 4923(1) | 10525(2) | 70(1)  |
| O(2)  | 2423(1) | 4639(1) | 9688(2)  | 89(1)  |
| C(6)  | 3029(2) | 4286(1) | 9300(3)  | 65(1)  |
| C(7)  | 2872(2) | 3746(2) | 9827(3)  | 83(1)  |
| C(8)  | 3029(3) | 3371(2) | 9296(4)  | 108(2) |
| C(9)  | 2868(2) | 4648(1) | 9876(2)  | 61(1)  |
| N(1)  | 3214(1) | 7973(1) | 448(2)   | 65(1)  |
| N(2)  | 4085(1) | 8229(1) | 758(2)   | 64(1)  |
| C(1)  | 2901(1) | 6790(1) | 453(2)   | 54(1)  |
| C(2)  | 3461(1) | 7225(1) | 451(2)   | 53(1)  |
| C(3)  | 3590(1) | 7814(1) | 536(2)   | 56(1)  |
| C(4)  | 3474(2) | 8580(2) | 607(3)   | 70(1)  |
| C(5)  | 4083(2) | 8759(2) | 815(3)   | 70(1)  |
| O(1S) | 1504(4) | 3556(4) | 9077(6)  | 132(4) |
| C(1S) | 1154(4) | 3289(3) | 9653(6)  | 158(3) |
| O(2S) | 1314(4) | 3831(4) | 9638(8)  | 138(4) |
| C(2S) | 1154(4) | 3289(3) | 9653(6)  | 158(3) |

Table S3. Bond lengths [Å] and angles [°] for **1<sub>2</sub>·2<sub>3</sub>**.

---

|                  |           |
|------------------|-----------|
| O(1)-C(9)        | 1.253(4)  |
| O(2)-C(9)        | 1.243(4)  |
| C(6)-C(6)#1      | 1.504(7)  |
| C(6)-C(9)        | 1.530(5)  |
| C(6)-C(7)        | 1.535(5)  |
| C(7)-C(8)        | 1.518(7)  |
| C(8)-C(8)#1      | 1.501(12) |
| N(1)-C(3)        | 1.314(4)  |
| N(1)-C(4)        | 1.470(5)  |
| N(2)-C(3)        | 1.307(4)  |
| N(2)-C(5)        | 1.462(4)  |
| C(1)-C(2)#2      | 1.385(4)  |
| C(1)-C(2)        | 1.400(4)  |
| C(2)-C(1)#3      | 1.385(4)  |
| C(2)-C(3)        | 1.483(4)  |
| C(4)-C(5)        | 1.523(6)  |
| O(1S)-C(1S)      | 1.215(9)  |
|                  |           |
| C(6)#1-C(6)-C(9) | 112.7(3)  |
| C(6)#1-C(6)-C(7) | 111.5(3)  |
| C(9)-C(6)-C(7)   | 108.7(3)  |
| C(8)-C(7)-C(6)   | 111.2(4)  |
| C(8)#1-C(8)-C(7) | 111.6(4)  |
| O(2)-C(9)-O(1)   | 123.6(3)  |
| O(2)-C(9)-C(6)   | 117.8(3)  |
| O(1)-C(9)-C(6)   | 118.6(3)  |
| C(3)-N(1)-C(4)   | 110.2(3)  |
| C(3)-N(2)-C(5)   | 111.3(3)  |
| C(2)#2-C(1)-C(2) | 120.2(3)  |
| C(1)#3-C(2)-C(1) | 119.8(3)  |
| C(1)#3-C(2)-C(3) | 120.4(3)  |
| C(1)-C(2)-C(3)   | 119.6(3)  |
| N(2)-C(3)-N(1)   | 112.6(3)  |
| N(2)-C(3)-C(2)   | 123.4(3)  |



|                |          |
|----------------|----------|
| N(1)-C(3)-C(2) | 123.9(3) |
| N(1)-C(4)-C(5) | 103.4(3) |
| N(2)-C(5)-C(4) | 102.5(3) |

---

Symmetry transformations used to generate equivalent atoms:

#1  $-x+2/3, -x+y+1/3, -z+11/6$     #2  $-y+1, x-y+1, z$     #3  $-x+y, -x+1, z$

Table S4. Anisotropic displacement parameters ( $\text{\AA}^2 \times 10^3$ ) for **1**<sub>2</sub>•**2**<sub>3</sub>. The anisotropic displacement factor exponent takes the form:  $-2\pi^2 [h^2 a^{*2} U^{11} + \dots + 2 h k a^* b^* U^{12}]$ .

|       | $U^{11}$ | $U^{22}$ | $U^{33}$ | $U^{23}$ | $U^{13}$ | $U^{12}$ |
|-------|----------|----------|----------|----------|----------|----------|
| O(1)  | 60(2)    | 53(1)    | 92(2)    | 1(1)     | 6(1)     | 25(1)    |
| O(2)  | 74(2)    | 99(2)    | 105(2)   | -21(2)   | -7(2)    | 53(2)    |
| C(6)  | 75(2)    | 44(2)    | 78(2)    | 2(2)     | 0(2)     | 32(2)    |
| C(7)  | 97(3)    | 48(2)    | 105(3)   | 15(2)    | 7(3)     | 37(2)    |
| C(8)  | 161(5)   | 52(2)    | 120(4)   | 4(3)     | -11(4)   | 58(3)    |
| C(9)  | 54(2)    | 45(2)    | 73(2)    | 4(2)     | 8(2)     | 17(2)    |
| N(1)  | 56(2)    | 52(2)    | 88(2)    | -1(2)    | 2(2)     | 28(2)    |
| N(2)  | 53(2)    | 50(2)    | 87(2)    | -4(1)    | 5(2)     | 24(2)    |
| C(1)  | 51(2)    | 55(2)    | 58(2)    | 3(1)     | 1(1)     | 28(2)    |
| C(2)  | 54(2)    | 50(2)    | 53(2)    | -1(1)    | -1(1)    | 25(2)    |
| C(3)  | 55(2)    | 53(2)    | 61(2)    | 2(1)     | 6(1)     | 28(2)    |
| C(4)  | 72(2)    | 50(2)    | 89(3)    | 0(2)     | 6(2)     | 31(2)    |
| C(5)  | 63(2)    | 48(2)    | 96(3)    | -2(2)    | 13(2)    | 25(2)    |
| O(1S) | 107(6)   | 125(8)   | 125(7)   | -19(6)   | 12(5)    | 29(6)    |
| C(1S) | 161(7)   | 120(6)   | 187(8)   | -19(5)   | 4(6)     | 66(5)    |
| O(2S) | 133(7)   | 99(6)    | 183(9)   | -14(6)   | -7(7)    | 60(5)    |
| C(2S) | 161(7)   | 120(6)   | 187(8)   | -19(5)   | 4(6)     | 66(5)    |

Table S5. Hydrogen coordinates ( $\times 10^4$ ) and isotropic displacement parameters ( $\text{\AA}^2 \times 10^3$ )  
for **1**<sub>2</sub>·**2**<sub>3</sub>.

|        | x        | y        | z         | U(eq)  |
|--------|----------|----------|-----------|--------|
| H(6)   | 2843(15) | 4214(15) | 8630(30)  | 78     |
| H(7A)  | 3127(19) | 3895(19) | 10360(30) | 99     |
| H(7B)  | 2480(20) | 3552(18) | 10120(30) | 99     |
| H(8A)  | 2918(15) | 3006(16) | 9690(30)  | 73     |
| H(8B)  | 2840(16) | 3274(16) | 8680(30)  | 73     |
| H(1N)  | 2859(17) | 7761(17) | 230(30)   | 73(11) |
| H(2N)  | 4377(18) | 8207(16) | 750(30)   | 72(12) |
| H(1)   | 2601(14) | 6850(14) | 460(20)   | 65     |
| H(4A)  | 3267(16) | 8647(15) | 1120(30)  | 84     |
| H(4B)  | 3411(17) | 8750(17) | 170(30)   | 84     |
| H(5A)  | 4379(17) | 9041(17) | 360(30)   | 84     |
| H(5B)  | 4200(17) | 8921(17) | 1460(30)  | 84     |
| H(1S)  | 1822     | 3729     | 9321      | 198    |
| H(1S1) | 864      | 3397     | 9651      | 237    |
| H(1S2) | 1333     | 3366     | 10253     | 237    |
| H(1S3) | 982      | 2887     | 9519      | 237    |
| H(2S)  | 1667     | 4022     | 9649      | 206    |
| H(2S1) | 852      | 3096     | 10099     | 237    |
| H(2S2) | 1473     | 3243     | 9822      | 237    |
| H(2S3) | 1018     | 3127     | 9048      | 237    |

Table S6. Hydrogen bonds for **1<sub>2</sub>·2<sub>3</sub>** [Å and °].

| D-H...A             | d(D-H)  | d(H...A) | d(D...A)  | <(DHA) |
|---------------------|---------|----------|-----------|--------|
| N(1)-H(1N)...O(2)#4 | 0.91(4) | 1.77(4)  | 2.642(4)  | 161(4) |
| N(2)-H(2N)...O(1)#5 | 0.84(4) | 1.89(4)  | 2.714(4)  | 169(4) |
| O(1S)-H(1S)...O(2)  | 0.84    | 2.27     | 2.923(10) | 134.8  |
| O(2S)-H(2S)...O(2)  | 0.84    | 1.92     | 2.733(10) | 162.8  |

Symmetry transformations used to generate equivalent atoms:

#1 -x+2/3,-x+y+1/3,-z+11/6    #2 -y+1,x-y+1,z    #3 -x+y,-x+1,z

#4 -x+y,-x+1,z-1    #5 -y+1,x-y+1,z-1
